1 **Analysis of Normal Levels of Urine and Plasma Free Glycosaminoglycans**  
2 **in Adults**

3 **Authors:** Sinisa Bratulic<sup>1</sup>, Angelo Limeta<sup>1</sup>, Francesca Maccari<sup>2</sup>, Fabio Galeotti<sup>2</sup>, Nicola  
4 Volpi<sup>2</sup>, Max Levin<sup>3,4,5</sup>, Jens Nielsen<sup>1,6</sup>, Francesco Gatto<sup>1,\*</sup>

5

6 **Affiliations:**

7 <sup>1</sup> Department of Biology and Biological Engineering, Chalmers University of Technology,  
8 412 96 Göteborg, Sweden.

9 <sup>2</sup> Department of Life Sciences, University of Modena and Reggio Emilia, 411 25 Modena,  
10 Italy.

11 <sup>3</sup> Department of Molecular and Clinical Medicine/Wallenberg Laboratory, Institute of  
12 Medicine, Sahlgrenska Academy, University of Gothenburg, Gothenburg, Sweden.

13 <sup>4</sup> Departments of Oncology, Sahlgrenska Academy, University of Gothenburg, 41345  
14 Göteborg, Sweden.

15 <sup>5</sup> Department of Oncology, Sahlgrenska University Hospital, 413 45, Gothenburg, Sweden.

16 <sup>6</sup> BioInnovation Institute, Ole Maaløes Vej 3, DK 2200 Copenhagen N, Denmark.

17

18 \* Current affiliation: Elypta AB, 171 65 Stockholm, Sweden.

19

20 **Contacts:**

21 To whom correspondence should be addressed: F. Gatto [gatto@chalmers.se](mailto:gatto@chalmers.se)

1 **Abstract**

2 Plasma and urine glycosaminoglycans (GAGs) are long linear sulfated polysaccharides  
3 recognized as potential non-invasive biomarkers for several diseases. However, owing to the  
4 analytical complexity associated with the measurement of GAG concentration and  
5 disaccharide composition, the so-called GAGome, a reference study of the normal healthy  
6 GAGome is currently missing. Here, we prospectively enrolled 308 healthy adults and  
7 analyzed their urine and plasma free GAGomes using a standardized ultra-high-performance  
8 liquid chromatography coupled with triple-quadrupole tandem mass spectrometry (UHPLC-  
9 MS/MS) method together with comprehensive demographic and blood chemistry biomarker  
10 data. Of 25 blood chemistry biomarkers, we mainly observed weak correlations between the  
11 free GAGome and creatinine in urine, and hemoglobin or erythrocyte counts in plasma. We  
12 found higher free GAGome concentration – but not composition - in males. Partitioned by  
13 gender, we established reference intervals for all detectable free GAGome features in urine  
14 and plasma. We carried out a transference analysis in healthy individuals from two distinct  
15 geographical sites, including the Lifelines Cohort Study, which validated the reference  
16 intervals in urine. Our study is the first large-scale determination of normal plasma and urine  
17 free GAGomes reference intervals and represents a critical resource for physiology and  
18 biomarker research.  
19

## 1 **Introduction**

2 Glycosaminoglycans (GAGs) are a family of long linear polysaccharides consisting of  
3 repeating disaccharide units (1). Different classes of GAGs have been characterized. In  
4 humans, the most prevalent classes are chondroitine sulfate (CS) [(→3)-β-D-GalNAc(1→4)-  
5 β-D-GlcA or α-L-IdoA(1→)], heparan sulfate (HS) [(→4)-α-D-GlcNAc or α-D-  
6 GlcNS(1→4)-β-D-GlcA or α-L-IdoA (1→)], and hyaluronic acid (HA) [(→3)-β-D-GlcNAc(1  
7 → 4)-β-D-GlcA(1→)] where GalNAc is N-acetylgalactosamine, GlcA is glucuronic acid,  
8 IdoA is iduronic acid, GlcNAc is N-acetylglucosamine, and GlcNS is N-sulfoglucosamine.  
9 glucuronic acid, which can be further modified by sulfation in up to three sites. CS and HS  
10 disaccharides can each be further modified with O-sulfo groups in up to three positions. The  
11 resulting sulfation motifs confer GAGs highly diverse biological functions that are essential  
12 for healthy human development and physiology (2). The panel of GAG motifs resulting from  
13 the diversity in structure and concentration of GAGs is collectively referred to as GAGome.

14 Alterations in the physiological function of GAGs have been associated with several diseases  
15 ranging from mucopolysaccharidosis, a group of rare metabolic disorders caused by genetic  
16 defects in lysosomal enzymes that degrade GAGs, to complex diseases such as sepsis,  
17 rheumatoid arthritis, and cancer (3–6). Plasma and urine GAGomes have been proposed as  
18 promising biomarkers for early non-invasive diagnostics (6). Despite the potential role of  
19 GAGs for clinical applications, the measurements of the GAGome has been limited to very  
20 small sample sizes (ranging from 3 healthy donors in (7) to 25 in (6)), in predominantly  
21 retrospective and selected donors, with different analytical techniques performed within  
22 academic laboratories (3, 4, 6–9). These limitations are due to the historical lack of effective  
23 analytical methods until recently (10–14), which proved hard to standardize and expensive to  
24 run. As a result, the GAGome values reported in the literature for healthy subjects are widely  
25 variable and cannot be consistently used as reference for physiology and biomarker research.

26 In this study, we took advantage of a standardized analytical method using ultra-high-  
27 performance liquid chromatography coupled with triple-quadrupole tandem mass  
28 spectrometry (UHPLC-MS/MS) (15) to analyze the urine and plasma free GAGomes in a  
29 Good Laboratory Practice (GLP)-compliant blinded central laboratory in two prospectively  
30 enrolled independent cohorts of 308 self-reported healthy subjects with comprehensive  
31 demographic and blood chemistry data. We first determined the correlation of free GAGomes  
32 with demographic and blood chemistry variables. Next, we established reference intervals for  
33 the normal urine and plasma free GAGomes according to accepted guidelines (CLSI EP28-  
34 A3c). Finally, we validated the proposed reference intervals by transference analysis on two  
35 independent cohorts consisting of a total of 140 healthy individuals from two distinct  
36 geographical sites.

37

1 **Patients and Methods.**

2 **Study design.** This study was designed and conducted in compliance with the CLSI.  
3 Defining, Establishing, and Verifying Reference Intervals in the Clinical Laboratory;  
4 Approved Guideline—Third Edition. CLSI document EP28-A3c. Wayne, PA: Clinical and  
5 Laboratory Standards Institute, 2008. The collection of specimens was planned prospectively  
6 with *a priori* criteria for population sampling. The present study was approved by the Ethical  
7 Committee (Etikprövningsmyndigheten) in Gothenburg, Sweden (#737-17 and #198-16).

8 **Reference sample group population.** This study prospectively enrolled self-rated healthy  
9 adult subjects in one site in Sweden forming two independent cohorts. Cohort 1 and 2 were  
10 used to form the reference sample group and they were both enrolled at Sabbatsberg Hospital,  
11 Stockholm, Sweden between May 2018 and December 2019. Inclusion criteria were: adults  
12 between 21 and 78 years old; at least moderate self-rated health; no history of cancer (except  
13 non-malignant skin cancer); no family history of cancer (first-degree relative); fit to undergo  
14 protocol procedures. Exclusion criteria were: abnormal PSA value in the last 5 years. Eligible  
15 participants were identified among volunteers based on a questionnaire by trained research  
16 nurses. Participants in each cohort formed a consecutive series. EDTA-plasma and spot-urine  
17 samples were collected in one single visit. Blood samples were also obtained by venipuncture  
18 from participants in Cohort 1 and 2 to evaluate laboratory biomarkers informative of the  
19 general health status of the subject, including the complete blood count, and the concentration  
20 of electrolytes (sodium, potassium, calcium), ALAT, ASAT, CRP, PSA, glycated hemoglobin  
21 (Cohort 2 only), LDL and HDL (Cohort 1 only). Subjects with abnormal values were referred  
22 for clinical examination but were otherwise retained in the study.

23 **Transference population.** The transference analysis was performed on two cohorts (Cohorts  
24 3 and 4) representative of healthy adults from two distinct and external geographical sites.  
25 Cohort 3 used retrospectively archived specimens from the Lifelines Cohort study (16).  
26 Inclusion criteria were: adults older than 18 years old; self-reported healthy. Exclusion criteria  
27 were: diagnosis of cancer within 18 months from sampling visit. Lifelines is a multi-  
28 disciplinary prospective population-based cohort study examining in a unique three-  
29 generation design the health and health-related behaviours of 167,729 persons living in the  
30 North of the Netherlands. It employs a broad range of investigative procedures in assessing  
31 the biomedical, socio-demographic, behavioural, physical and psychological factors which  
32 contribute to the health and disease of the general population, with a special focus on multi-  
33 morbidity and complex genetics. Cohort 4 was enrolled prospectively at Sahlgrenska  
34 University Hospital, Göteborg, Sweden. Inclusion criteria were: adults older than 18 years  
35 old; self-reported healthy. Exclusion criteria were: none.

36 **Glycosaminoglycan measurements.** Urine was collected at room temperature in a  
37 polypropylene cup. EDTA-plasma was collected through venipuncture in a vacuette at room  
38 temperature and next subjected to centrifugation (1100-1300 g, 20 minutes at room  
39 temperature in Cohort 1, 2500 g 15 minutes at 4 °C in Cohort 2) within 15 minutes. Samples  
40 could be stored refrigerated (4 °C) for 12 hours prior to transfer to a freezer (-20 °C in Cohort  
41 1, -70 °C in Cohort 2). Shipment was performed at the same temperature as storage.

1 Sample preparation was performed in a single blinded GLP-compliant laboratory using the  
2 MIRAM<sup>TM</sup> Free Glycosaminoglycan Kit (Elypta AB, Sweden) to extract glycosaminoglycans  
3 (GAGs) from urine samples. GAG detection and quantification was obtained through ultra-  
4 high-performance liquid chromatography coupled with triple-quadrupole mass spectrometry  
5 (Waters® Acquity I-class Plus Xevo TQ-S micro) in accordance with the instruction for use  
6 in of the kit (15).

7 Laboratory measurements of the GAGome included the absolute concentration in  $\mu\text{g/mL}$  of  
8 chondroitin sulfate (CS), heparan sulfate (HS), hyaluronic acid (HA) disaccharides, resulting  
9 in 17 independently measured features. Specifically, we quantified eight CS disaccharides (0s  
10 CS, 2s CS, 6s CS, 4s CS, 2s6s CS, 2s4s CS, 4s6s CS, Tris CS) and eight HS disaccharides (0s  
11 HS, 2s HS, 6s HS, Ns HS, Ns6s HS, Ns2s HS, 2s6s HS, Tris HS) – corresponding to different  
12 sulfation patterns of CS and HS – and one HA disaccharide. A measured GAGome feature  
13 was considered detectable in a fluid (plasma or urine) if its mean concentration across all  
14 samples was  $> 0.1 \mu\text{g mL}^{-1}$  (15).

15 The detectable GAGome was further used to calculate additional dependent features,  
16 including the total amount of CS and HS (as a sum of individually measured disaccharides),  
17 the CS and HS composition (as mass fractions of individual detectable CS and HS  
18 disaccharides) and the CS and HS charge (as the ratio of the sulfated disaccharides weighted  
19 by their charge and total CS and HS disaccharides).

20 **Statistical analysis.** Before all analyses, GAGome features were transformed with Box-Cox  
21 transformation to identify and exclude outliers. Reference intervals were established for each  
22 urine and plasma free GAGome feature using a simple nonparametric method after outlier  
23 identification and exclusion. The lower and upper reference limits (reference intervals) for  
24 individual GAGs were estimated as the 2.5th and 97.5th percentiles of the distribution of  
25 measured values for the reference population, respectively.

26 The correlation between each GAGome feature and each clinical (e.g. age) or biochemical  
27 (e.g. LDL) variable was calculated by univariable linear regression of a given GAGome  
28 feature as response variable on a given clinical or biochemical variable as explanatory  
29 variable. We computed the statistical significance of each correlation using a likelihood ratio  
30 test versus an intercept-only regression model. Multiple hypothesis testing was adjusted using  
31 the Benjamini-Hochberg or Bonferroni corrections depending on if clinical or biochemical  
32 variables were tested, and  $FDR$  values  $< 0.1$  and  $p$ -values  $< 1.67 \cdot 10^{-4}$  were considered  
33 statistically significant, respectively. All statistical analyses were carried out in *R* (4.0.4) (17).

## 34 **Results**

### 35 **Subject characteristics**

36 We prospectively enrolled two cohorts of self-rated healthy adults with no history nor family  
37 history of cancer (except non-melanoma skin cancer) from one site in Stockholm, Sweden  
38 (Cohort 1,  $N = 292$  and 2,  $N = 16$ ), for a total of 308 participants (Table 1). Cohort 1 and 2  
39 formed the reference sample group to establish reference intervals.

40 Subjects' characteristics were balanced between cohorts (Table 1). Across cohorts, the  
41 median age was 57 years (range: 22 – 78) with 188 (61%) women and 120 (39%) men.

1 Virtually all subjects self-reported good (51%) or very good (45%) health status. The panel of  
 2 blood chemistry markers measured in Cohort 1 and 2 was the same, except for HDL/LDL  
 3 (measured in Cohort 1 only) and glycated hemoglobin (measured in Cohort 2 only). Complete  
 4 blood counts were available for Cohort 1, while Cohort 2 had available measurements for  
 5 erythrocyte, leukocyte and platelet counts. Blood chemistry showed normal values for all  
 6 biomarkers in 47% of the subjects, values outside the reference intervals for up to 2  
 7 biomarkers in 45% of the subjects, and more than two abnormal values in 23 subjects (8%).  
 8 The abnormal blood chemistry values were mostly due to elevated calcium (12.2 % subjects),  
 9 low sodium (10.4%), low CRP (7.5%), low EGFR (7.2%) and elevated PSA (5%). We kept  
 10 subjects with abnormal values in the reference sample group and performed a sensitivity  
 11 analysis of the reference values within this subgroup.

12 The plasma and urine free GAGomes were measured in a single GLP-compliant blinded  
 13 laboratory using a standardized kit on UHPLC-MS/MS in all Cohort 1 and 2 samples ( $N =$   
 14 308).

15 **Table 1.** Subject characteristics in the reference sample group (Cohort 1 and Cohort 2).  
 16 Distributions are summarized as median and min-max range in brackets. Missing values were  
 17 omitted.

|                                                            | <b>Cohort 1</b>      | <b>Cohort 2</b>  | <b>Cohort 1 + 2</b>  |
|------------------------------------------------------------|----------------------|------------------|----------------------|
| <b>N</b>                                                   | 292                  | 16               | 308                  |
| <b>Age</b>                                                 | 57 (22-78)           | 43 (27-51)       | 57 (22-78)           |
| <b>Gender</b>                                              |                      |                  |                      |
| Female                                                     | 183                  | 5                | 188                  |
| Male                                                       | 109                  | 11               | 120                  |
| <b>Self-rated health</b>                                   |                      |                  |                      |
| Moderate                                                   | 10                   | 0                | 10                   |
| Good                                                       | 153                  | 5                | 158                  |
| Very good                                                  | 129                  | 11               | 140                  |
| <b>Blood chemistry biomarkers</b>                          |                      |                  |                      |
| ALAT ( $\mu\text{kat/L}$ )                                 | 0.36 (0.13-2.44)     | 0.49 (0.27-1.1)  | 0.37 (0.13-2.44)     |
| ASAT ( $\mu\text{kat/L}$ )                                 | 0.41 (0.22-1.65)     | 0.41 (0.27-0.59) | 0.41 (0.22-1.65)     |
| Calcium ( $\text{mmol/L}$ )                                | 2.39 (2.15-2.72)     | 2.42 (2.17-2.58) | 2.39 (2.15-2.72)     |
| Creatinine ( $\mu\text{mol/L}$ )                           | 69 (46-167)          | 80 (59-102)      | 69.5 (46-167)        |
| CRP ( $\text{mg/L}$ )                                      | 1.4 (0.2-54.1)       | 0.65 (0.27-5.5)  | 1.3 (0.2-54.1)       |
| EGFR ( $\text{mL/min/1.73m}^2$ )                           | 82.5 (33-90)         | 90 (76-90)       | 83 (33-90)           |
| Glycated hemoglobin ( $\text{mmol/mol}$ )                  | -                    | 33.5 (28-39)     | 33.5 (28-39)         |
| HDL ( $\text{mg/dL}$ )                                     | 61.87 (29.78-123.74) | -                | 61.87 (29.78-123.74) |
| LDL ( $\text{mg/dL}$ )                                     | 131.48 (46.4-239.75) | -                | 131.48 (46.4-239.75) |
| Potassium ( $\text{mmol/L}$ )                              | 4.2 (3.5-5.2)        | 4.2 (3.9-4.9)    | 4.2 (3.5-5.2)        |
| Prostate specific antigen level ( $\text{ng/mL}$ )         | 0.8 (0.11-9.8)       | 0.7 (0.33-1.4)   | 0.8 (0.11-9.8)       |
| Sodium ( $\text{mmol/L}$ )                                 | 39 (132-145)         | 140.5 (138-144)  | 139 (132-145)        |
| <b>Complete blood count</b>                                |                      |                  |                      |
| Hematocrit (%)                                             | 0.42 (0.35-0.51)     | 0.44 (0.37-0.48) | 0.42 (0.35-0.51)     |
| Hemoglobin ( $\text{g/L}$ )                                | 141 (116-178)        | 145.5 (118-163)  | 141 (116-178)        |
| Mean corpuscular hemoglobin ( $\text{pg}$ )                | 30 (24-37)           | 30 (27-31)       | 30 (24-37)           |
| Mean corpuscular hemoglobin concentration ( $\text{g/L}$ ) | 336 (304-366)        | 331 (315-351)    | 336 (304-366)        |
| Mean corpuscular volume ( $\text{fL}$ )                    | 90 (81-101)          | 89.5 (86-94)     | 90 (81-101)          |
| Absolute neutrophil count ( $10^9/\text{L}$ )              | 3.2 (1-7.7)          | -                | 3.2 (1-7.7)          |
| Basophil count ( $10^9/\text{L}$ )                         | 0 (0-0.2)            | -                | 0 (0-0.2)            |

|                                   |                |                |                |
|-----------------------------------|----------------|----------------|----------------|
| Eosinophil count ( $10^9/L$ )     | 0.1 (0-2.8)    | -              | 0.1 (0-2.8)    |
| Erythrocyte count ( $10^{12}/L$ ) | 4.6 (3.8-5.8)  | 4.85 (4.1-5.3) | 4.6 (3.8-5.8)  |
| Leukocyte count ( $10^9/L$ )      | 5.6 (2.8-10.8) | 5.75 (3.5-7.7) | 5.6 (2.8-10.8) |
| Lymphocyte count ( $10^9/L$ )     | 1.7 (0.7-4.5)  | -              | 1.7 (0.7-4.5)  |
| Monocyte count ( $10^9/L$ )       | 0.4 (0.2-0.9)  | -              | 0.4 (0.2-0.9)  |
| Platelet count ( $10^9/L$ )       | 261 (137-488)  | 239 (166-377)  | 261 (137-488)  |
| <b>Blood chemistry status</b>     |                |                |                |
| No abnormal values                | 135            | 11             | 146            |
| 1-2 abnormal values               | 134            | 5              | 139            |
| >2 abnormal values                | 23             | 0              | 23             |

1

## 2 **Effect of blood chemistry on the normal free GAGome**

3 We sought to characterize whether other blood chemistry biomarkers were correlated with the  
4 normal urine or plasma free GAGome.

5 First, we classified subjects in groups indicative of their general health status depending on  
6 the number of abnormal values for the blood chemistry biomarkers here tested. Specifically,  
7 we grouped the subjects into three groups: 1) no abnormal values (“No abnormal value”,  $N =$   
8 146), 2) one or two abnormal values (“1-2 abnormal values”,  $N = 139$ ), or 3) more than two  
9 abnormal values (“>2 abnormal values”,  $N = 23$ ). We did not observe any statistical  
10 associations between any of GAGome features with any of these groups (Table S1).

11 Second, we investigated linear correlations between the concentration of each detectable  
12 GAGome feature and each of the 25 blood chemistry biomarker level (as a continuous  
13 variable) and focused on correlations that reached statistical significance after controlling for  
14 multiple testing ( $p < 1.67 \cdot 10^{-4}$ , Bonferroni correction, Figure S2). In urine, we observed weak  
15 to moderate positive correlations ( $\rho = 0.23-0.3$ ) between multiple GAGome features with  
16 creatinine. Additionally, the urine 6s CS concentration was positively correlated with  
17 hemoglobin, hematocrit, and erythrocyte count ( $\rho = 0.24 - 0.25$ ) and negatively correlated  
18 with HDL ( $\rho = -0.22$ ). For the plasma free GAGome, the total plasma and 4s CS  
19 concentrations were weakly positively correlated with hemoglobin and erythrocyte count ( $\rho =$   
20 0.21-0.28). Additionally, plasma 4s CS was correlated with hematocrit ( $\rho = 0.25$ ), while 0s  
21 CS negatively correlated with HDL at  $\rho = -0.22$ , (Figure S2).

## 22 **Effect of age and gender on the normal free GAGome**

23 We sought to identify if the urine or plasma free GAGome correlated with age and gender that  
24 could partition the reference intervals.

25 We did not observe any statistically significant association between age (as a continuous  
26 variable) and any GAGome feature (Table S2, Figure S1).

27 We observed statistically significant associations between gender and 10 detectable GAGome  
28 features ( $FDR < 0.1$ , Table S3, Figure 1-2). In plasma, the effect of gender was generally  
29 limited to an average 7% increase in total CS and 11% increase 4s CS concentration in males.  
30 The urine of males contained on average 31%-41% higher concentration for the major CS  
31 disaccharides (0s, 4s, 6s, and 2s6s CS), resulting in an average 34% increase in total CS; and  
32 an average 50% and 73% higher concentration for the major HS disaccharides (0s and Ns,  
33 respectively), resulting in an average 47% increase in total HS.



## 1 Reference intervals for the normal free GAGome

2 Given the effects of gender on the GAGome, we decided to partition reference intervals by  
 3 gender. We thus defined reference intervals for urine and plasma free GAGome  
 4 concentrations and composition for apparently healthy males and females between the ages of  
 5 22 and 78.

6 First, we established reference intervals for the urine free GAGome after outlier identification  
 7 and exclusion. For each disaccharide, *bona fide* outliers were identified according to a pre-  
 8 specified procedure and omitted (median % of outliers across CS disaccharides: 2% in males,  
 9 0% in females; across HS: 3% in males, 3% in females).

10 We then established the reference intervals partitioned by gender of all urine free CS and HS  
 11 features (Figure 1, Table 2).

12

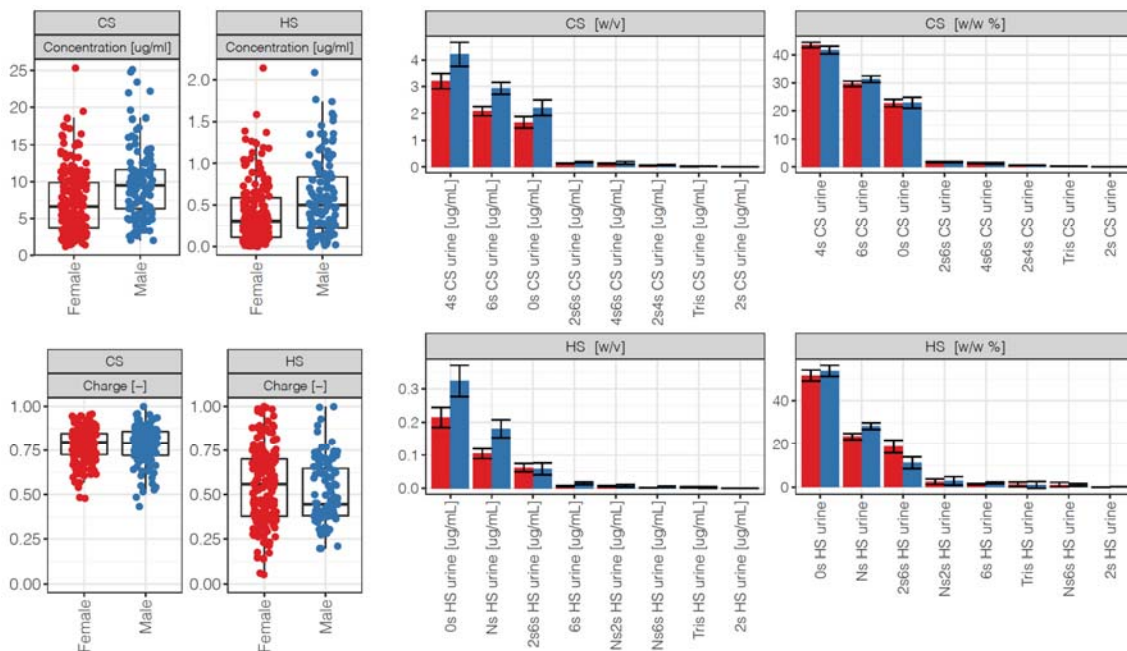

13

14 **Figure 1.** Urine free total CS and HS concentration ( $\mu\text{g/ml}$ ), charge, and disaccharide concentration ( $\mu\text{g/ml}$ ) and  
 15 composition (in mass fraction %) in the reference sample group by gender (Cohort 1 and 2,  $N_{\text{females}} = 188$   $N_{\text{males}} =$   
 16 120). Error bars indicate  $\pm 1.96$  SEM (95% confidence interval). Key: Red – female, blue - male.

17 The average urine free total CS concentration was  $8.86 \mu\text{g/ml}$  in males and  $6.99 \mu\text{g/ml}$  in  
 18 females. The CS composition in males and females was nearly identical. The three major  
 19 disaccharides made up 42% and 44% (4s CS), 31% and 30% (6s CS), and 23% and 22% (0s  
 20 CS) of the CS fraction in urine of males and females, respectively. Of the multi-sulfated CS  
 21 disaccharides, the 2s6s CS and 4s6s CS cumulatively contributed approximately 3% to the CS  
 22 fraction in both males and females, while 2s4s CS and Tris CS were undetectable. The  
 23 average urine CS charge was 0.78 for males and females.

24 The average urine total free HS concentration was  $0.46 \mu\text{g/ml}$  in males and  $0.25 \mu\text{g/ml}$  in  
 25 females. The only detectable free HS disaccharides were 0s HS and Ns HS. The HS urine



1 composition was 55% Os HS and 30% Ns HS in males, and 53% Os HS and 23% Ns HS in  
2 females. The average HS charge was 0.35 in males and 0.30 in females.  
3

1 **Table 2.** Reference intervals of urine free total CS and HS concentration ( $\mu\text{g/ml}$ ) and  
 2 disaccharide concentration ( $\mu\text{g/ml}$ ) and composition (% w/w) by gender. Outliers were  
 3 excluded.

|                               | Female (N = 188) |       |                    | Male (N = 120) |       |                    |
|-------------------------------|------------------|-------|--------------------|----------------|-------|--------------------|
|                               | Outliers         | Mean  | Reference Interval | Outliers       | Mean  | Reference Interval |
| <b>CS</b>                     |                  |       |                    |                |       |                    |
| <b>Concentration</b>          |                  |       |                    |                |       |                    |
| Total CS [ $\mu\text{g/mL}$ ] | -                | 6.99  | [1.77-16.04]       | -              | 8.86  | [2.62-17.17]       |
| 4s CS [ $\mu\text{g/mL}$ ]    | 0 (0.0%)         | 3.19  | [0.68-7.42]        | 2 (2.0%)       | 4.04  | [0.84-10.14]       |
| 6s CS [ $\mu\text{g/mL}$ ]    | 0 (0.0%)         | 2.07  | [0.54-4.68]        | 1 (1.0%)       | 2.90  | [0.87-5.67]        |
| 0s CS [ $\mu\text{g/mL}$ ]    | 2 (1.0%)         | 1.59  | [0.20-5.18]        | 5 (4.0%)       | 1.99  | [0.36-4.86]        |
| 2s6s CS [ $\mu\text{g/mL}$ ]  | 0 (0.0%)         | 0.13  | [0.00-0.37]        | 1 (1.0%)       | 0.18  | [0.00-0.43]        |
| 4s6s CS [ $\mu\text{g/mL}$ ]  | 9 (5.0%)         | 0.09  | [0.00-0.41]        | 8 (7.0%)       | 0.10  | [0.00-0.44]        |
| <b>Composition</b>            |                  |       |                    |                |       |                    |
| 4s CS [%]                     | 2 (1.0%)         | 43.66 | [32.00-55.26]      | 4 (3.0%)       | 42.10 | [29.31-53.73]      |
| 6s CS [%]                     | 0 (0.0%)         | 29.76 | [16.38-43.89]      | 2 (2.0%)       | 31.19 | [19.44-42.51]      |
| 0s CS [%]                     | 2 (1.0%)         | 22.28 | [6.57-40.65]       | 2 (2.0%)       | 22.62 | [6.32-46.47]       |
| 2s6s CS [%]                   | 0 (0.0%)         | 1.73  | [0.00-3.31]        | 0 (0.0%)       | 1.75  | [0.00-3.24]        |
| 4s6s CS [%]                   | 0 (0.0%)         | 1.41  | [0.00-4.25]        | 2 (2.0%)       | 1.20  | [0.00-4.43]        |
| Charge CS                     | 2 (1.0%)         | 0.78  | [0.60-0.93]        | 1 (1.0%)       | 0.78  | [0.57-0.94]        |
| <b>HS</b>                     |                  |       |                    |                |       |                    |
| <b>Concentration</b>          |                  |       |                    |                |       |                    |
| Total HS                      | -                | 0.25  | [0.00-0.68]        | -              | 0.46  | [0.00-1.23]        |
| 0s HS [ $\mu\text{g/mL}$ ]    | 10 (5.0%)        | 0.18  | [0.00-0.55]        | 2 (2.0%)       | 0.31  | [0.00-0.84]        |
| Ns HS [ $\mu\text{g/mL}$ ]    | 13 (7.0%)        | 0.08  | [0.00-0.24]        | 4 (3.0%)       | 0.16  | [0.00-0.42]        |
| <b>Composition</b>            |                  |       |                    |                |       |                    |
| 0s HS [%]                     | 5 (3.0%)         | 52.57 | [18.65-83.45]      | 5 (4.0%)       | 55.19 | [32.97-73.63]      |
| Ns HS [%]                     | 2 (1.0%)         | 22.96 | [1.45-40.31]       | 8 (7.0%)       | 29.72 | [13.27-41.34]      |
| Charge HS                     | 0 (0.0%)         | 0.30  | [0.06-0.47]        | 0 (0.0%)       | 0.35  | [0.21-0.44]        |

1 We repeated the procedure above for the plasma free GAGome (median % of outliers across  
 2 CS disaccharides: 0 % in males or 1% in females, Figure 2, Table 3). The plasma HS fraction  
 3 was largely undetectable (mean total HS < 0.001  $\mu\text{g}/\text{ml}$ ) and we therefore omitted it from  
 4 further analyses.

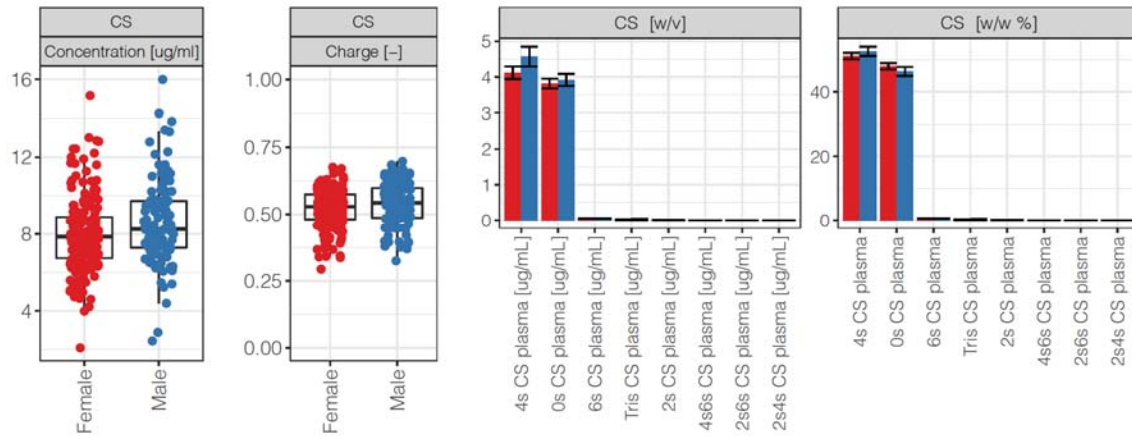

5  
 6 **Figure 2.** Plasma free total CS concentration ( $\mu\text{g}/\text{ml}$ ), charge, and disaccharide concentration ( $\mu\text{g}/\text{ml}$ ) and  
 7 composition (in mass fraction %) in the reference sample group (Cohort 1 and 2). Plasma free HS was  
 8 undetectable. Error bars indicate +/- 1.96 SEM (95% confidence interval). Key: Red – female, blue - male.

9 The average plasma free total CS concentration was 8.52  $\mu\text{g}/\text{ml}$  in males and 7.79  $\mu\text{g}/\text{ml}$  in  
 10 females. The CS composition was nearly identical across genders, 53% and 51% 4s CS and  
 11 46% and 48% 0s CS (Table 3) for males and females, respectively. The remaining free CS  
 12 disaccharides were undetectable. The average plasma CS charge was 0.53 in men and 0.52 in  
 13 women.

14 **Table 3.** Reference intervals of plasma free total CS concentration ( $\mu\text{g}/\text{ml}$ ) and disaccharide  
 15 concentration ( $\mu\text{g}/\text{ml}$ ) and composition (% w/w) by gender. Plasma free HS was undetectable.  
 16 Outliers were excluded.

|                                   | Female (N = 188) |       |                    | Male (N = 120) |       |                    |
|-----------------------------------|------------------|-------|--------------------|----------------|-------|--------------------|
|                                   | Outliers         | Mean  | Reference Interval | Outliers       | Mean  | Reference Interval |
| <b>CS</b>                         |                  |       |                    |                |       |                    |
| <b>Concentration</b>              |                  |       |                    |                |       |                    |
| Total CS                          |                  | 7.79  | [4.91-11.28]       |                | 8.52  | [5.93-12.78]       |
| 4s CS [ $\mu\text{g}/\text{mL}$ ] | 6 (3.0%)         | 4.07  | [2.07-6.37]        | 2 (2.0%)       | 4.55  | [2.25-8.02]        |
| 0s CS [ $\mu\text{g}/\text{mL}$ ] | 4 (2.0%)         | 3.78  | [2.26-5.48]        | 4 (3.0%)       | 3.96  | [2.56-5.82]        |
| <b>Composition</b>                |                  |       |                    |                |       |                    |
| 4s CS [%]                         | 2 (1.0%)         | 51.41 | [36.16-62.06]      | 0 (0.0%)       | 52.64 | [36.64-65.46]      |
| 0s CS [%]                         | 1 (1.0%)         | 48.02 | [37.77-64.12]      | 0 (0.0%)       | 46.37 | [33.92-62.09]      |

|           | Female (N = 188) |      |                    | Male (N = 120) |      |                    |
|-----------|------------------|------|--------------------|----------------|------|--------------------|
|           | Outliers         | Mean | Reference Interval | Outliers       | Mean | Reference Interval |
| Charge CS | 0 (0.0%)         | 0.52 | [0.36-0.62]        | 0 (0.0%)       | 0.53 | [0.37-0.66]        |

1

## 2 **Transference of reference intervals in an independent population**

3 We validated the transference of the above established reference intervals for each GAGome  
 4 feature in two independent populations from two distinct geographical sites (Cohort 3 and 4)  
 5 by determining the complete urine and plasma free GAGome in Cohort 3 (N = 110, 60 males  
 6 and 50 females) and Cohort 4 (N = 30, 15 males and 15 females). The average age was 59  
 7 years old (range 30-84) for Cohort 3 and 45 years old (range 22-66) for Cohort 4. We  
 8 observed that Cohort 3 and 4 had largely similar GAGome measurements. Therefore, we  
 9 opted to carry out the transference analysis in a group combining Cohort 3 and Cohort 4,  
 10 partitioned by gender (N = 140, 65 females and 75 males, see Tables S4 and S5 for  
 11 transference analyses on separate cohorts).

12 Across all urine free GAGome features, we excluded 0-9.2 % (median = 1.5%) outliers in  
 13 females and 0-12 % (median = 3.3%) in males. Across all plasma free GAGome features, we  
 14 excluded 0-4.6 % (median = 1.5%) outliers in females and 0-1.3 % (median = 0%) in males.  
 15 We next determined the percentage of values outside the established reference limits for each  
 16 urine and plasma GAGome feature, where <5% was considered acceptable for transference  
 17 validation.

18 In urine, we observed that the transference of reference intervals was validated in both  
 19 genders for the concentration of all detectable free GAGome features (Table 4). The total  
 20 urine CS was outside the reference interval in 5.6% samples, while all samples had total HS  
 21 within the reference interval. As regards composition, we observed a shift towards a higher 4s  
 22 CS % (mean in reference sample group: 44% in females, 42% in males; in transference group:  
 23 50% in females, 47% in males) and concomitantly other smaller shifts towards lower values  
 24 in the remaining CS disaccharides.

25 In plasma, we could not validate the transference of reference intervals for either of the two  
 26 detectable plasma free GAGome features (0s CS and 4s CS) since 5 to 29% of the  
 27 transference group had increased concentration (Table 5). The discrepancy was less  
 28 pronounced for composition, where 11-22% had values outside the reference intervals.

29 **Table 4.** Transference of reference intervals of urine free CS and HS in an independent  
 30 population (Cohorts 3 and 4). Outliers were excluded.

|               | Female (N = 65) |      |               |              |                       | Male (N = 75) |      |               |              |                       |
|---------------|-----------------|------|---------------|--------------|-----------------------|---------------|------|---------------|--------------|-----------------------|
|               | N               | Mean | Ref. Interval | Cohort Range | Outside Ref. Interval | N             | Mean | Ref. Interval | Cohort Range | Outside Ref. Interval |
| CS            |                 |      |               |              |                       |               |      |               |              |                       |
| Concentration |                 |      |               |              |                       |               |      |               |              |                       |

|                               | Female (N = 65) |      |               |              |                       | Male (N = 75) |      |               |              |                       |
|-------------------------------|-----------------|------|---------------|--------------|-----------------------|---------------|------|---------------|--------------|-----------------------|
|                               | N               | Mean | Ref. Interval | Cohort Range | Outside Ref. Interval | N             | Mean | Ref. Interval | Cohort Range | Outside Ref. Interval |
| Total CS [ $\mu\text{g/mL}$ ] | 62              | 6.2  | 1.8-16.0      | 2.3-18.8     | 2 (3.2%)              | 72            | 8.7  | 2.6-17.2      | 2.5-26.7     | 4 (5.6%)              |
| 4s CS [ $\mu\text{g/mL}$ ]    | 65              | 3.1  | 0.7-7.4       | 1.0-10.2     | 2 (3.1%)              | 75            | 4.1  | 0.8-10.1      | 1.4-14.0     | 2 (2.7%)              |
| 6s CS [ $\mu\text{g/mL}$ ]    | 65              | 1.6  | 0.5-4.7       | 0.7-6.9      | 1 (1.5%)              | 74            | 2.2  | 0.9-5.7       | 0.7-7.3      | 3 (4.1%)              |
| 0s CS [ $\mu\text{g/mL}$ ]    | 62              | 1.2  | 0.2-5.2       | 0.3-4.9      | 0 (0.0%)              | 73            | 1.9  | 0.4-4.9       | 0.5-5.2      | 2 (2.7%)              |
| 2s6s CS [ $\mu\text{g/mL}$ ]  | 64              | 0.1  | 0.0-0.4       | 0.0-0.4      | 2 (3.1%)              | 70            | 0.2  | 0.0-0.4       | 0.0-0.4      | 1 (1.4%)              |
| 4s6s CS [ $\mu\text{g/mL}$ ]  | 65              | 0.1  | 0.0-0.4       | 0.0-0.4      | 0 (0.0%)              | 70            | 0.2  | 0.0-0.4       | 0.0-0.4      | 0 (0.0%)              |
| <b>Composition</b>            |                 |      |               |              |                       |               |      |               |              |                       |
| 4s CS [%]                     | 60              | 49.4 | 32.0-55.3     | 32.4-61.8    | 13 (21.7%)            | 72            | 46.9 | 29.3-53.7     | 35.4-57.4    | 10 (13.9%)            |
| 6s CS [%]                     | 62              | 25.4 | 16.4-43.9     | 14.2-33.2    | 2 (3.2%)              | 73            | 25.5 | 19.4-42.5     | 17.1-33.7    | 5 (6.8%)              |
| 0s CS [%]                     | 64              | 19.6 | 6.6-40.6      | 5.5-44.1     | 3 (4.7%)              | 75            | 22.2 | 6.3-46.5      | 6.9-50.6     | 1 (1.3%)              |
| 2s6s CS [%]                   | 64              | 2.0  | 0.0-3.3       | 0.5-3.4      | 2 (3.1%)              | 68            | 2.0  | 0.0-3.2       | 0.6-3.6      | 2 (2.9%)              |
| 4s6s CS [%]                   | 65              | 1.9  | 0.0-4.2       | 0.0-4.6      | 2 (3.1%)              | 75            | 2.0  | 0.0-4.4       | 0.0-4.8      | 1 (1.3%)              |
| Charge CS                     | 64              | 0.8  | 0.6-0.9       | 0.6-0.9      | 6 (9.4%)              | 74            | 0.8  | 0.6-0.9       | 0.6-0.9      | 0 (0.0%)              |
| <b>HS</b>                     |                 |      |               |              |                       |               |      |               |              |                       |
| <b>Concentration</b>          |                 |      |               |              |                       |               |      |               |              |                       |
| Total HS [ $\mu\text{g/mL}$ ] | 59              | 0.3  | 0.0-0.7       | 0.0-0.7      | 1 (1.7%)              | 66            | 0.3  | 0.0-1.2       | 0.0-0.8      | 0 (0.0%)              |
| 0s HS [ $\mu\text{g/mL}$ ]    | 61              | 0.2  | 0.0-0.6       | 0.0-0.7      | 2 (3.3%)              | 70            | 0.2  | 0.0-0.8       | 0.0-0.8      | 0 (0.0%)              |
| Ns HS [ $\mu\text{g/mL}$ ]    | 61              | 0.1  | 0.0-0.2       | 0.0-0.2      | 1 (1.6%)              | 68            | 0.1  | 0.0-0.4       | 0.0-0.2      | 2 (2.9%)              |
| <b>Composition</b>            |                 |      |               |              |                       |               |      |               |              |                       |
| 0s HS [%]                     | 65              | 55.5 | 18.6-83.5     | 6.4-80.6     | 3 (4.6%)              | 75            | 52.7 | 33.0-73.6     | 2.3-74.7     | 9 (12.0%)             |
| Ns HS [%]                     | 62              | 22.6 | 1.4-40.3      | 8.8-30.7     | 0 (0.0%)              | 71            | 23.4 | 13.3-41.3     | 10.9-34.9    | 6 (8.5%)              |
| Charge HS                     | 65              | 0.5  | 0.1-0.5       | 0.2-1.0      | 33 (50.8%)            | 75            | 0.5  | 0.2-0.4       | 0.3-1.0      | 41 (54.7%)            |

1  
2

1 **Table 5.** Transference of reference intervals of plasma free CS in an independent population  
 2 (Cohorts 3 and 4). Outliers were excluded.

|                      | Female (N = 65) |      |               |              |                       | Male (N = 75) |      |               |              |                       |
|----------------------|-----------------|------|---------------|--------------|-----------------------|---------------|------|---------------|--------------|-----------------------|
|                      | N               | Mean | Ref. Interval | Cohort Range | Outside Ref. Interval | N             | Mean | Ref. Interval | Cohort Range | Outside Ref. Interval |
| <b>CS</b>            |                 |      |               |              |                       |               |      |               |              |                       |
| <b>Concentration</b> |                 |      |               |              |                       |               |      |               |              |                       |
| Total CS [µg/mL]     | 62              | 10.0 | 4.9-11.3      | 6.7-14.9     | 18 (29.0%)            | 74            | 10.1 | 5.9-12.8      | 6.7-15.9     | 4 (5.4%)              |
| 4s CS [µg/mL]        | 63              | 5.6  | 2.1-6.4       | 3.2-8.5      | 18 (28.6%)            | 75            | 5.5  | 2.3-8.0       | 2.9-11.0     | 4 (5.3%)              |
| 0s CS [µg/mL]        | 64              | 4.4  | 2.3-5.5       | 2.6-8.5      | 7 (10.9%)             | 74            | 4.5  | 2.6-5.8       | 2.4-8.2      | 12 (16.2%)            |
| <b>Composition</b>   |                 |      |               |              |                       |               |      |               |              |                       |
| 4s CS [%]            | 65              | 56.3 | 36.2-62.1     | 30.0-72.3    | 14 (21.5%)            | 75            | 54.6 | 36.6-65.5     | 33.7-72.8    | 11 (14.7%)            |
| 0s CS [%]            | 64              | 42.8 | 37.8-64.1     | 26.9-59.1    | 14 (21.9%)            | 75            | 44.7 | 33.9-62.1     | 26.4-65.9    | 11 (14.7%)            |
| Charge CS            | 65              | 0.6  | 0.4-0.6       | 0.3-0.7      | 15 (23.1%)            | 75            | 0.6  | 0.4-0.7       | 0.3-0.7      | 12 (16.0%)            |

3

#### 4 **Discussion**

5 In this study, we established reference intervals for the urine and plasma free GAGomes in a  
 6 large adult healthy population by taking advantage of standardized high throughput UHPLC-  
 7 MS/MS method (15). In addition, the extensive demographic and biochemical  
 8 characterization of subjects allowed us to assess novel correlations with the free GAGome.

9 We found that no free GAGome feature showed any notable differences with respect to age  
 10 in adults. While this finding in urine agree with previous studies analyzing total – as opposed  
 11 to free - GAGomes (18), it contradicts similar studies in plasma, where an increase with age  
 12 was reported in males only (19). In contrast to age, we found that the concentrations of  
 13 several CS and HS disaccharides were higher in males than females with a larger effect in  
 14 urine than plasma. Previous studies noted gender differences in total GAGomes, although in  
 15 the opposite directions for both urine and plasma (18, 19). The origin of these discrepancies  
 16 remains to be ascertained, but we speculate that they could be attributed to the focus on the  
 17 total rather than the free GAGome fraction in previous studies, as well as older analytical  
 18 techniques for GAG measurements and smaller sample sizes. We also observed that urine free  
 19 GAGomes appeared independent of other blood chemistry biomarkers, including markers of  
 20 inflammation, glucose metabolism, and liver functions – underscoring that they may reflect an  
 21 independent physiological state in adults. The only exception was serum creatinine, which in  
 22 the context of its correlation with urine free GAGomes may indicate a dependency on urine



1 excretion rather than renal function. Thus, we speculate that normalization by urinary  
2 creatinine could render urine free GAGome measurements more robust. In contrast, plasma  
3 free CS had weak correlations with markers related to erythrocytes, particularly 4s CS. This  
4 association has been previously described for platelets where their activation can lead to rapid  
5 increases of circulating 4s CS (20), but not in the context of other blood cells such as  
6 erythrocytes.

7 We observed that the reference intervals established for free GAGomes were remarkably tight  
8 in the reference sample group. In plasma, each free GAGome feature deviated by ~75% at  
9 most from the mean. Similarly, in the urine each feature deviated by a maximum of ~3-fold  
10 from the mean. These findings suggest that urine and plasma free GAGomes have stable and  
11 predictable levels in a healthy adult. This conclusion appears corroborated by the transference  
12 analysis that validated all reference intervals established for urine in independent adult  
13 samples from two different geographical sites. Even among the free GAGome features that  
14 failed to validate the reference intervals, chiefly in plasma, the deviation from the reference  
15 sample group was limited. For example, the mean plasma 4s CS concentration was 4.1 ng mL<sup>-1</sup>  
16 in the female reference sample group and 5.6 ng mL in the transference group, that is 36%  
17 higher. In comparison, the reference interval for the platelet count in the reference sample  
18 group spans 137 to 488•10<sup>9</sup> L<sup>-1</sup>, a 3-fold difference between the reference limits. Considering  
19 this, we speculation that if a substantial deviation of a free GAGome feature from the here  
20 reported reference interval is observed in an adult, then this deviation may be more indicative  
21 of a disease state than physiological variability. This makes free GAGomes suitable  
22 candidates for biomarker studies.

23 In conclusion, this study established and validated reference intervals for plasma and urine  
24 free GAGomes in the largest adult population to date. As such, we believe that this study  
25 represents a critical resource for physiology and biomarker research using biofluidic free  
26 GAGomes.

## 27 **Acknowledgments**

28 This work was supported by the Knut and Alice Wallenberg Foundation, Cancerfonden, and  
29 the IngaBritt och Arne Lundbergs Forskningsstiftelse (J.N.) and in part by the European  
30 Union's Horizon 2020 research and innovation programme under grant agreement No 849251  
31 and the EIT Healthy 2019 Digital Sandbox (Grant No 2019-DS1001-6543) (Fr.G.). The  
32 Lifelines initiative has been made possible by the subsidy from the Dutch ministry of Health,  
33 Welfare, and Sport, the Dutch Ministry of Economic Affairs, the University Medical Center  
34 Groningen (UMCG), Groningen University, and the Provinces in the North of the  
35 Netherlands (Drenthe, Friesland, Groningen). The authors wish to thank the research nurses  
36 Lena Solitander and Elisabeth Kapocs, and Karolinska Trial Alliance for help in the  
37 coordination, supervision, and collection of clinical data and samples used in this study.

## 38 **Author contributions**

39 Fr.G., J.N conceived, designed, and coordinated the study. S.B., A.L., and Fr.G. performed  
40 data analysis and statistics. N.V., Fa.G., and F.M. assisted with the laboratory method. M.L.

1 contributed to subject enrollment. S.B., A.L., and Fr.G. drafted the manuscript. All authors  
2 edited and approved the manuscript in its final form.

### 3 **Conflict of interest**

4 At study start, Fr.G. and J.N. were listed as co-inventors in patent applications related to the  
5 biomarkers described in this study. At the time of submission, Fr.G. and J.N. were  
6 shareholders in Elypta AB, which owned the above-mentioned patent applications, Fr.G. was  
7 an employee in Elypta AB and J.N. was member of the board. Fr.G. and J.N. declare no  
8 further conflict of interest. All other authors declare no conflict of interest.

### 9 **References**

- 10 1. Y.-H. Chen, Y. Narimatsu, T. M. Clausen, C. Gomes, R. Karlsson, C. Steentoft, C. B.  
11 Spliid, T. Gustavsson, A. Salanti, A. Persson, A. Malmström, D. Willén, U. Ellervik, E. P.  
12 Bennett, Y. Mao, H. Clausen, Z. Yang, The GAGome: a cell-based library of displayed  
13 glycosaminoglycans. *Nature Methods*. **15**, 881–888 (2018).
- 14 2. D. Soares da Costa, R. L. Reis, I. Pashkuleva, Sulfation of Glycosaminoglycans and Its  
15 Implications in Human Health and Disorders. *Annual Review of Biomedical Engineering*.  
16 **19**, 1–26 (2017).
- 17 3. S. A. Khan, R. W. Mason, R. Giugliani, K. Orii, T. Fukao, Y. Suzuki, S. Yamaguchi, H.  
18 Kobayashi, T. Orii, S. Tomatsu, Glycosaminoglycans analysis in blood and urine of  
19 patients with mucopolysaccharidosis. *Mol Genet Metab*. **125**, 44–52 (2018).
- 20 4. E. P. Schmidt, K. H. Overdier, X. Sun, L. Lin, X. Liu, Y. Yang, L. A. Ammons, T. D.  
21 Hiller, M. A. Suflita, Y. Yu, Y. Chen, F. Zhang, C. Cothren Burlew, C. L. Edelstein, I. S.  
22 Douglas, R. J. Linhardt, Urinary Glycosaminoglycans Predict Outcomes in Septic Shock  
23 and Acute Respiratory Distress Syndrome. *Am J Respir Crit Care Med*. **194**, 439–449  
24 (2016).
- 25 5. J. Y. Wang, M. H. Roehrl, Glycosaminoglycans are a potential cause of rheumatoid  
26 arthritis. *Proc Natl Acad Sci U S A*. **99**, 14362–14367 (2002).
- 27 6. F. Gatto, N. Volpi, H. Nilsson, I. Nookaew, M. Maruzzo, A. Roma, M. E. Johansson, U.  
28 Stierner, S. Lundstam, U. Basso, J. Nielsen, Glycosaminoglycan Profiling in Patients’  
29 Plasma and Urine Predicts the Occurrence of Metastatic Clear Cell Renal Cell Carcinoma.  
30 *Cell Rep*. **15**, 1822–1836 (2016).
- 31 7. W. Wei, M. R. Niñonuevo, A. Sharma, L. M. Danan-Leon, J. A. Leary, A Comprehensive  
32 Compositional Analysis of Heparin/Heparan Sulfate-Derived Disaccharides from Human  
33 Serum. *Anal. Chem*. **83**, 3703–3708 (2011).
- 34 8. F. Gatto, K. A. Blum, S. S. Hosseini, M. Ghanaat, M. Kashan, F. Maccari, F. Galeotti, J.  
35 J. Hsieh, N. Volpi, A. A. Hakimi, J. Nielsen, Plasma Glycosaminoglycans as Diagnostic  
36 and Prognostic Biomarkers in Surgically Treated Renal Cell Carcinoma. *European*  
37 *Urology Oncology*. **1**, 364–377 (2018).
- 38 9. F. Gatto, M. Maruzzo, C. Magro, U. Basso, J. Nielsen, Prognostic Value of Plasma and  
39 Urine glycosaminoglycan scores in clear cell renal cell carcinoma. *Front Oncol*. **6** (2016),  
40 doi:10.3389/fonc.2016.00253.

- 1 10. W. Wei, R. L. Miller, J. A. Leary, Method development and analysis of free HS and HS in  
2 proteoglycans from pre- and postmenopausal women: evidence for biosynthetic pathway  
3 changes in sulfotransferase and sulfatase enzymes. *Anal Chem.* **85**, 5917–5923 (2013).
- 4 11. N. Volpi, F. Galeotti, B. Yang, R. J. Linhardt, Analysis of glycosaminoglycan-derived,  
5 precolumn, 2-aminoacridone-labeled disaccharides with LC-fluorescence and LC-MS  
6 detection. *Nature Protocols.* **9**, 541–558 (2014).
- 7 12. X. Han, P. Sanderson, S. Nesheiwat, L. Lin, Y. Yu, F. Zhang, I. J. Amster, R. J. Linhardt,  
8 Structural analysis of urinary glycosaminoglycans from healthy human subjects.  
9 *Glycobiology.* **30**, 143–151 (2020).
- 10 13. X. Sun, L. Li, K. H. Overdier, L. A. Ammons, I. S. Douglas, C. C. Burlew, F. Zhang, E.  
11 P. Schmidt, L. Chi, R. J. Linhardt, Analysis of Total Human Urinary Glycosaminoglycan  
12 Disaccharides by Liquid Chromatography–Tandem Mass Spectrometry. *Anal Chem.* **87**,  
13 6220–6227 (2015).
- 14 14. S. Tomatsu, T. Shimada, R. W. Mason, J. Kelly, W. A. LaMarr, E. Yasuda, Y. Shibata, H.  
15 Futatsumori, A. M. Montaña, S. Yamaguchi, Y. Suzuki, T. Orii, Assay for  
16 Glycosaminoglycans by Tandem Mass Spectrometry and its Applications. *J Anal Bioanal*  
17 *Tech.* **2014**, 006 (2014).
- 18 15. D. Tamburro, S. Bratulic, S. Abou Shameh, N. K. Soni, A. Bacconi, F. Maccari, F.  
19 Galeotti, K. Mattsson, N. Volpi, J. Nielsen, F. Gatto, Analytical Performance of a  
20 Standardized Kit for Mass Spectrometry-based Measurements of Human  
21 Glycosaminoglycans. *Journal of Chromatography B*, 122761 (2021).
- 22 16. S. Scholtens, N. Smidt, M. A. Swertz, S. J. Bakker, A. Dotinga, J. M. Vonk, F. van Dijk,  
23 S. K. van Zon, C. Wijmenga, B. H. Wolffenbuttel, R. P. Stolk, Cohort Profile: LifeLines,  
24 a three-generation cohort study and biobank. *International Journal of Epidemiology.* **44**,  
25 1172–1180 (2015).
- 26 17. R Development Core Team, *R: A Language and Environment for Statistical Computing*  
27 (2021; <http://www.r-project.org/>).
- 28 18. P. W. Larking, B. W. McDonald, M. L. Taylor, A. D. Kirkland, Urine  
29 glycosaminoglycans in a reference population: Effects of age, body surface area, and  
30 postmenopausal status. *Biochemical Medicine and Metabolic Biology.* **37**, 246–254  
31 (1987).
- 32 19. P. W. Larking, Total glycosaminoglycans in the plasma of adults: Effects of age and  
33 gender, and relationship to plasma lipids: A preliminary study. *Biochemical Medicine and*  
34 *Metabolic Biology.* **42**, 192–197 (1989).
- 35 20. O. A. Hamad, P. H. Nilsson, M. Lasaosa, D. Ricklin, J. D. Lambris, B. Nilsson, K. N.  
36 Ekdahl, Contribution of Chondroitin Sulfate A to the Binding of Complement Proteins to  
37 Activated Platelets. *PLOS ONE.* **5**, e12889 (2010).

38
